# Supplementary material
Source: MDPI journal article supplement (https://www.mdpi.com/1424-8247/17/3/385)
Supplement: s1 [file s1]

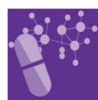

## Article

# Exploring the Therapeutic Potential of *Ammodaucus leucotrichus* Seed Extracts: A Multi-Faceted Analysis of Phytochemical Composition, Anti-Inflammatory Efficacy, Predictive Anti-Arthritic Properties, and Molecular Docking Insights

Cheima Djehiche <sup>1</sup>, Nadia Benzidane <sup>1</sup>, Hanene Djeghim <sup>2</sup>, Mehdi Tebboub <sup>3</sup>, El Hassen Mokrani <sup>4</sup>, Saad Mebrek <sup>2</sup>, Mohammed Messaoudi <sup>5</sup>, Chawki Bensouici <sup>2</sup>, Ali Alsalmé <sup>6</sup>, David Cornu <sup>7</sup>, Mikhael Bechelany <sup>7,8</sup>, Lekhmici Arrar <sup>1,\*</sup> and Ahmed Barhoum <sup>9,\*</sup>

<sup>1</sup> Laboratory of Applied Biochemistry, Department of Biochemistry, Faculty of Nature and Life Sciences, Ferhat Abbas University of Setif 1, Setif 19000, Algeria

<sup>2</sup> Biochemistry Laboratory, Division of Biotechnology and Health, Biotechnology Research Center (CRBt), Constantine 25000, Algeria

<sup>3</sup> Department of Mechanical Engineering, Faculty of Science and Technology, University Mentouri Brothers Constantine 1, Constantine 25000, Algeria

<sup>4</sup> Laboratory of Applied Biochemistry, Department of Biochemistry and Cellular and Molecular Biology, Faculty of Natural and Life Sciences, University Mentouri Brothers Constantine 1, Constantine 25000, Algeria

<sup>5</sup> Nuclear Research Centre of Birine, P.O. Box 180, Ain Oussera 17200, Algeria

<sup>6</sup> Department of Chemistry, College of Science, King Saud University, Riyadh 11451, Saudi Arabia

<sup>7</sup> Institut Européen des Membranes (IEM), UMR 5635, Univ. Montpellier, ENSCM, CNRS, Place Eugène Bataillon, 34095 Montpellier, France

<sup>8</sup> Functional Materials Group, Gulf University for Science and Technology (GUST), Mubarak Al-Abdullah 32093, Kuwait

<sup>9</sup> NanoStruc Research Group, Chemistry Department, Faculty of Science, Helwan University, Cairo 11795, Egypt

\* Correspondence: lekhararr@univ-setif.dz (L.A.); ahmed.barhoum@science.helwan.edu.eg (A.B.)

Supplementary information

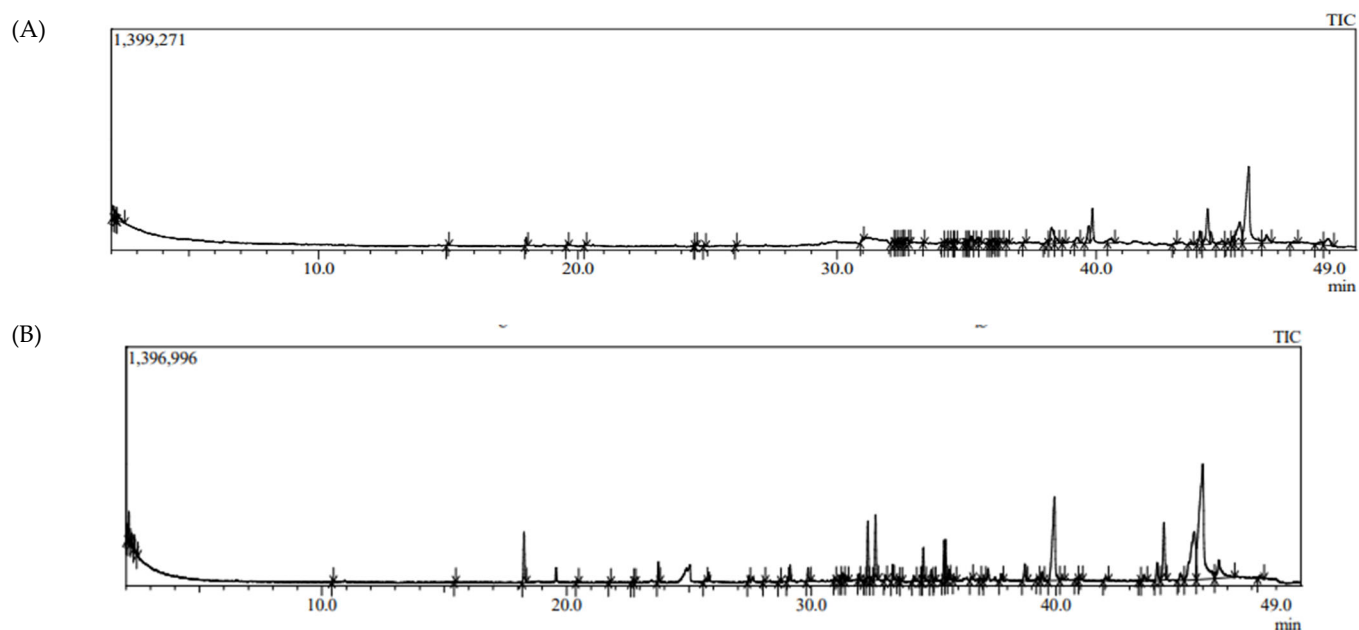

Figure S1. Gas chromatography-mass spectrometry analysis of (A) the methanol and (B) n-hexane extracts of *Ammodaucus leucotrichus* seeds. The chromatograms show the abundance of the different compounds in relation to their retention time (in minutes).

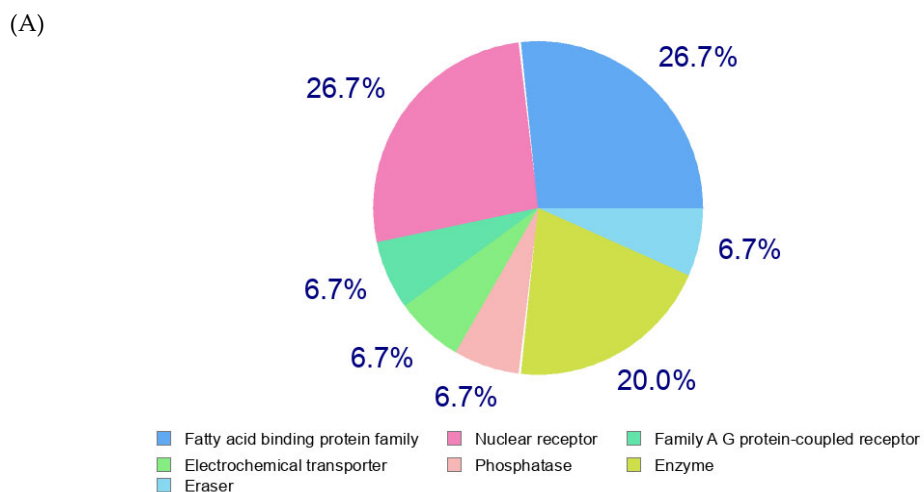

(B)

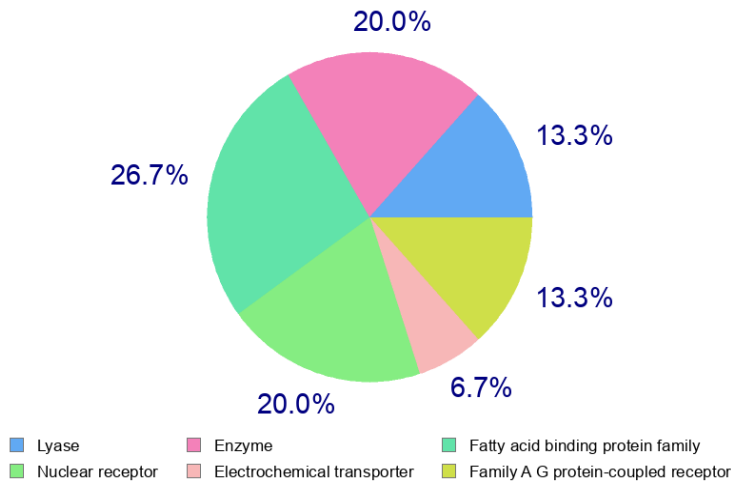

(C)

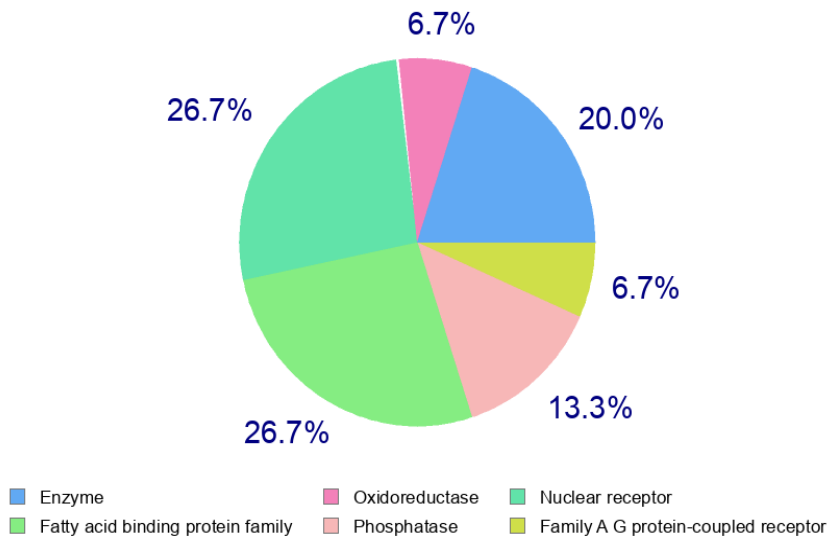

(D)

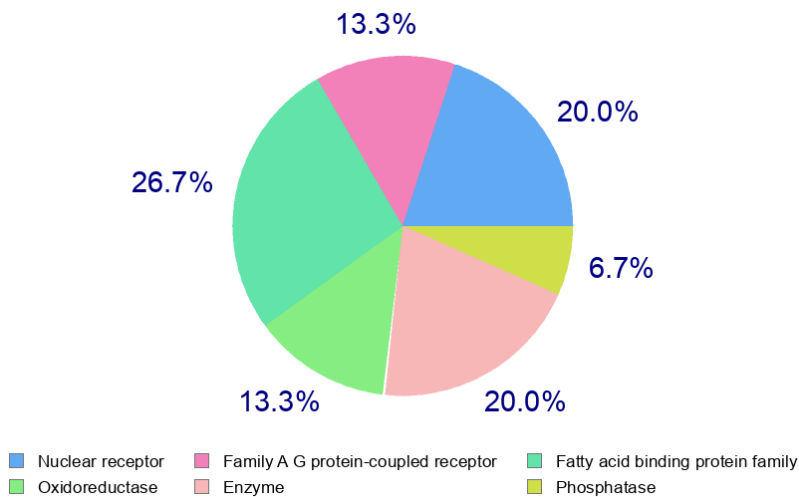

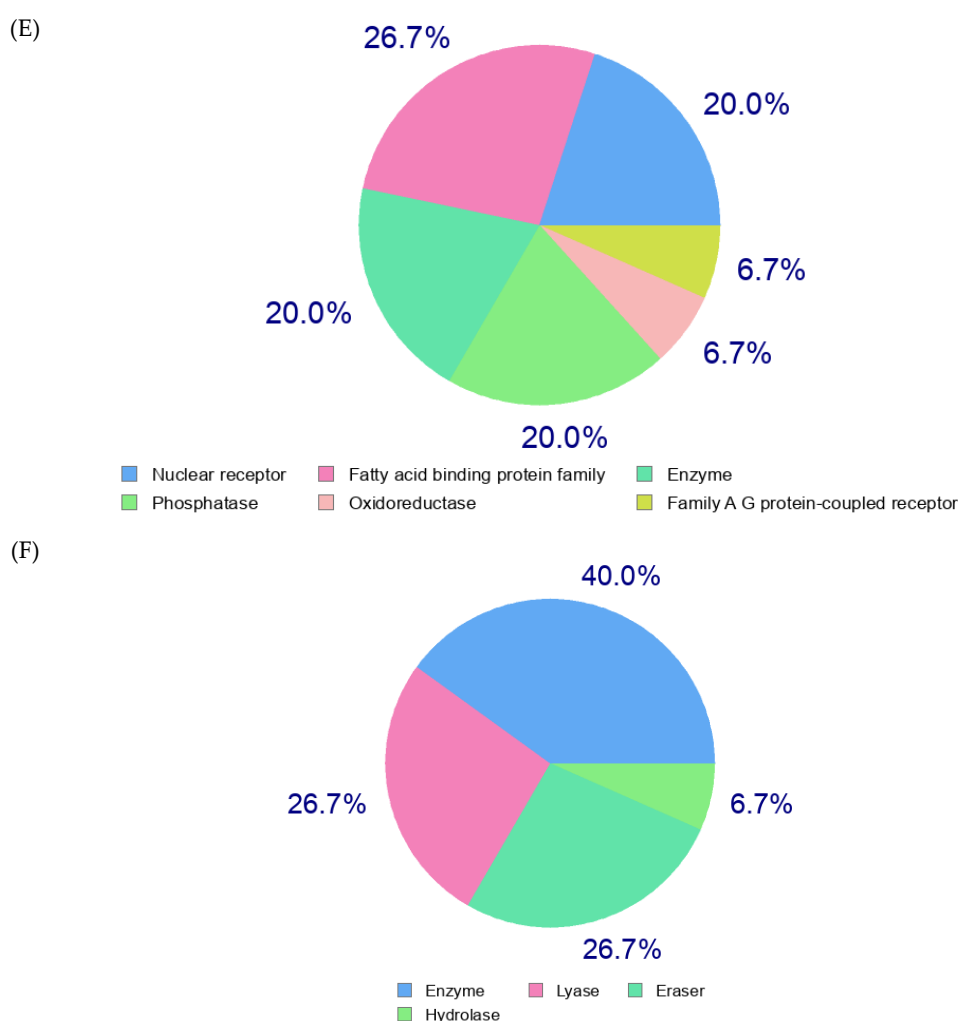

Figure S2. Data on the predicted target of the selected compounds identified in the *Ammodaucus leucotrichus* methanol extract. The selected compounds, namely (A) n-hexadecanoic acid, (B) hexadecanoic acid methyl ester, (C) 9-octadecenoic acid methyl ester (E)-, (D) (9Z, 12Z)-Octadeca-9,12-dienoic acid, (E) 9-octadecenoic acid, and (F) 2-hydroxyacetohydrazide, exhibit interactions with probable targets, including enzymes, the fatty acid binding protein family, G-protein-coupled receptors, and nuclear receptors.

Table S1. Comprehensive list of the phytochemicals identified in the methanol extract by gas chromatography-mass spectrometry. The table includes compound name, molecular formula, molecular weight, retention time, peak area, and PubChem Compound Identifier (CID).

| N° | Compound                              | Classification   | Chemical formula                               | Molecular weight (g/mol) | Retention time (min) | Peak area (%) | PubChem CID |
|----|---------------------------------------|------------------|------------------------------------------------|--------------------------|----------------------|---------------|-------------|
| S1 | 9-Octadecenoic acid                   | Fatty Acid       | C <sub>18</sub> H <sub>34</sub> O <sub>2</sub> | 282.5                    | 45.880               | 29.69         | 637517      |
| S2 | Methyl(9Z,12Z)-octadeca-9,12-dienoate | Fatty Acid Ester | C <sub>19</sub> H <sub>36</sub> O <sub>2</sub> | 296.5                    | 44.296               | 8.87          | 5280590     |
| S3 | Octadeca-9,12-dienoic acid            | Fatty Acid       | C <sub>18</sub> H <sub>32</sub> O <sub>2</sub> | 280.4                    | 45.537               | 8.77          | 5280450     |
| S4 | Methyl hexadecanoate                  | Fatty Acid Ester | C <sub>17</sub> H <sub>34</sub> O <sub>2</sub> | 270.5                    | 38.275               | 4.87          | 8181        |

|     |                                                                                                                |                       |              |         |        |      |               |
|-----|----------------------------------------------------------------------------------------------------------------|-----------------------|--------------|---------|--------|------|---------------|
| S5  | n-Hexadecanoic acid                                                                                            | Fatty Acid            | C16H32O2     | 256.42  | 39.713 | 3.86 | 985           |
| S6  | Methyl (9Z,12Z)-octadeca-9,12-dienoate                                                                         | Fatty Acid Ester      | C19H34O2     | 294.5   | 43.994 | 2.89 | 5284421       |
| S7  | Trichothec-9-ene-3,4,8,15-tetrol, 12,13-epoxy-, 15-acetate 8-(3-methylbutanoate), (3.alpha.,4.beta.,8.alpha.)- | Trichothecene         | C22H32O8     | 424.5   | 48.948 | 2.89 | 520286        |
| S8  | Octadecanoic acid                                                                                              | Fatty Acid            | C18H36O2     | 284.5   | 46.557 | 2.76 | 5281          |
| S9  | (6Z,9Z,12Z,15Z)-neophytadiene                                                                                  | Sesquiterpene         | C20H38       | 278.5   | 35.173 | 1.82 | 10446         |
| S10 | Methyl-5,9,13-trimethyltetradecanoate                                                                          | Fatty Acid Ester      | C18H36O2     | 284.5   | 45.295 | 1.75 | 554056        |
| S11 | Cis-7,8-Epoxy-2-methyloctadecane                                                                               | Pheromone             | C19H38O      | 282.5   | 40.551 | 1.61 | 205983        |
| S12 | 3-Isopropyl-6,7-dimethyltricyclo[4.4.0.0(2,8)]decane-9,10-diol                                                 | Tricyclic Alcohol     | C15H26       | 238.366 | 38.410 | 1.57 | 491383        |
| S13 | 2-hydroxyacetohydrazide                                                                                        | Hydrazide             | C2H6N2O<br>2 | 90.08   | 2.240  | 1.53 | 350536        |
| S14 | Phthalic acid, butyl hept-4-yl ester                                                                           | Phthalate Ester       | C19H28O4     | 320.4   | 38.269 | 1.45 | 91720764      |
| S15 | Kauren-19-yl-acetate                                                                                           | Diterpene Ester       | C22H34O2     | 330     | 44.870 | 1.31 | 537596        |
| S16 | 4,4-Dimethyl-2-pentanone                                                                                       | Ketone                | C7H14O       | 114.19  | 2.134  | 1.36 | 11546         |
| S17 | trans-(R,R)-chrysanthemyl (R)-2-methylbutanoate                                                                | Ester                 | C15H26O2     | 238.37  | 48.635 | 1.17 | 91693481      |
| S18 | 3-Isopropyl-6,7-dimethyltricyclo[4.4.0.0(2,8)]decane-9,10-diol                                                 | Tricyclic Alcohol     | C15H26O2     | 238.37  | 32.642 | 0.97 | 565273        |
| S19 | Phthalic acid, tetradecyl trans-dec-3-enyl ester                                                               | Phthalate Ester       | C32H52O4     | 500.8   | 36.002 | 0.97 | 91719824      |
| S20 | 5-Hydroxymethylfurfural                                                                                        | Furfural Derivative   | C6H6O3       | 126.11  | 18.004 | 0.87 | 237332        |
| S21 | (1S,2R,4aS,8aS)-1,2,4a,5,8,8a-hexahydro-1,4a-dimethyl-7-(1-methylethyl)-1-naphthalenol                         | Sesquiterpene Alcohol | C15H24O      | 220.35  | 35.490 | 0.76 | 10230303<br>0 |
| S22 | 8-Isopropyl-1,5-dimethyltricyclo[4.4.0.02,7]dec-4-en-3-one                                                     | Tricyclic Ketone      | C15H22O      | 218.33  | 35.345 | 0.75 | 12313013      |
| S23 | 3,7,11,15-Tetramethyl-2-hexadecen-1-ol                                                                         | Sesquiterpene Alcohol | C20H40O      | 296.5   | 36.591 | 0.68 | 5366244       |
| S24 | 1-Tetracontane                                                                                                 | Saturated Hydrocarbon | C40H82       | 563.1   | 47.624 | 0.68 | 20149         |

|     |                                                                                                                             |                                       |                                                    |        |        |      |           |
|-----|-----------------------------------------------------------------------------------------------------------------------------|---------------------------------------|----------------------------------------------------|--------|--------|------|-----------|
| S25 | 5-nitrobenzofuran-2(3H)-one                                                                                                 | Nitrobenzofuran                       | C <sub>8</sub> H <sub>3</sub> NO <sub>5</sub>      | 193.11 | 36.288 | 0.64 | 230976    |
| S26 | 6-(3-Hydroxyprop-1-en-2-yl)-4,8α-dimethyl-2,4α,5,6,7,8-hexahydro-1H-naphthalen-2-ol                                         | Naphthalene Derivative                | C <sub>15</sub> H <sub>24</sub> O <sub>2</sub>     | 236.35 | 43.610 | 0.64 | 535256    |
| S27 | (1R,3R,4S,7S)-3,7-dimethyl-1-(propan-2-yl)bicyclo[4.4.0]dec-3-ene-2,6-diol                                                  | Sesquiterpene Alcohol                 | C <sub>15</sub> H <sub>24</sub> O                  | 220.35 | 32.184 | 0.63 | 102303030 |
| S28 | (2R,5S)-5-[(1R)-1,5-dimethylhex-4-en-1-yl]-2-methylcyclohex-2-en-1-one                                                      | Sesquiterpene Aldehyde                | C <sub>15</sub> H <sub>24</sub> O                  | 220.35 | 34.931 | 0.60 | 565584    |
| S29 | 1H-Cycloprop[e]azulen-7-ol, decahydro-1,1,7-trimethyl-4-methylene-, [1ar-(1a.alpha.,4a.alpha.,7.beta.,7a.beta.,7b.alpha.)]- | Sesquiterpene Alcohol                 | C <sub>15</sub> H <sub>24</sub> O                  | 220.35 | 34.590 | 0.59 | 6432640   |
| S30 | 2,4,7,14-Tetramethyl-4-vinyl-tricyclo[5.4.3.0(1,8)]tetradecan-6-ol                                                          | Sesquiterpene Alcohol                 | C <sub>20</sub> H <sub>34</sub> O                  | 290.5  | 35.872 | 0.59 | 590916    |
| S31 | 2-(trans-2,6,6-Trimethylbicyclo[3.3.1]heptan-3-yl)buta-1,3-diene                                                            | Terpene                               | C <sub>14</sub> H <sub>22</sub>                    | 190    | 45.116 | 0.58 | 13895     |
| S32 | 2-aminopropan-1-ol                                                                                                          | Amino Alcohol                         | C <sub>3</sub> H <sub>9</sub> NO                   | 75.11  | 2.205  | 0.57 | 5126      |
| S33 | (1R,4R,6R,10S)-4,12,12-Trimethyl-9-methylene-5-oxatricyclo[8.2.0.0.4,6]dodecane                                             | Tricyclic Terpene                     | C <sub>15</sub> H <sub>24</sub> O                  | 220.35 | 30.995 | 0.55 | 1742210   |
| S34 | Octahydro-2-benzothiophene                                                                                                  | Polycyclic Aromatic Hydrocarbon (PAH) | C <sub>20</sub> H <sub>20</sub> O                  | 276.4  | 35.940 | 0.54 | 155017    |
| S35 | n-tetradecanoic acid                                                                                                        | Fatty Acid                            | C <sub>14</sub> H <sub>28</sub> O <sub>2</sub>     | 228.37 | 34.215 | 0.49 | 11005     |
| S36 | Methyl 16-R/S-hydroxy-cleroda-3,13(14)-Z-dien-15,16-olide                                                                   | Diterpene                             | C <sub>22</sub> H <sub>32</sub> O <sub>4</sub>     | 360.5  | 35.014 | 0.47 | 16042541  |
| S37 | 3beta-Trimethylsiloxy-5alpha,6alpha-epoxycholestane                                                                         | Steroid                               | C <sub>30</sub> H <sub>54</sub> O <sub>2</sub> Si  | 474.8  | 32.394 | 0.43 | 16082384  |
| S38 | Methyl hexadecanoate                                                                                                        | Fatty Acid Ester                      | C <sub>17</sub> H <sub>34</sub> O <sub>2</sub>     | 270.5  | 38.736 | 0.41 | 8181      |
| S39 | 1-dodecyltrichlorosilane                                                                                                    | Organosilicon Compound                | C <sub>12</sub> H <sub>25</sub> Cl <sub>3</sub> Si | 303.8  | 32.610 | 0.38 | 20568     |
| S40 | 4-Isopropyl-1,7,11-trimethyl-2,7,11-cyclotetradecatrien-1-ol                                                                | Not available                         | C <sub>20</sub> H <sub>34</sub> O                  | 290.5  | 32.330 | 0.39 | 5363523   |

|     |                                                                                                                              |                        |             |         |        |      |           |
|-----|------------------------------------------------------------------------------------------------------------------------------|------------------------|-------------|---------|--------|------|-----------|
| S41 | 3-Hydroxy-3-methyl-butyric acid, hydrazide                                                                                   | Hydrazide              | C5H12N2O2   | 132.16  | 35.075 | 0.38 | 299142    |
| S42 | 4-Prop-1-en-2-ylcyclohexene-1-carboxylic acid                                                                                | Carboxylic Acid        | C10H14O     | 150.22  | 19.592 | 0.35 | 16441     |
| S43 | 2-Ethylidene-1,7,7-trimethylbicyclo[2.2.1]heptane                                                                            | Terpene                | C12H20      | 164.29  | 34.099 | 0.33 | 143908    |
| S44 | octadecamethyl-1,2,3,4,5,6,7,8,9-nonasiloxane                                                                                | Siloxane               | C18H54O9Si9 | 667.4   | 36.130 | 0.33 | 11172     |
| S45 | Spiro[5.6]dodecan-7-one                                                                                                      | Ketone                 | C12H20O     | 180.29  | 32.535 | 0.30 | 282264    |
| S46 | 1-(1,5-Dimethylhexyl)-10-hydroxy-3a,6,6,9a,11a-pentamethylhexadecahydrocyclopenta[7,8]-phenanthro[8a,9-b]oxiren-7-yl acetate | Terpene Ester          | C32H54O4    | 502.8   | 34.350 | 0.31 | 541562    |
| S47 | (2R,5S)-5-[(1R)-1,5-dimethylhex-4-en-1-yl]-2-methylcyclohex-2-en-1-one                                                       | Sesquiterpene Aldehyde | C15H24      | 220.350 | 37.249 | 0.30 | 103883460 |
| S48 | Heptadecanoic acid                                                                                                           | Fatty Acid             | C17H34O2    | 270.5   | 43.056 | 0.29 | 10465     |
| S49 | 4-Prop-1-en-2-ylcyclohexene-1-carboxylic acid                                                                                | Carboxylic Acid        | C10H14O2    | 166.22  | 24.881 | 0.28 | 1256      |
| S50 | 1,2,3,4,5-Penta-O-acetyl-D-xylitol                                                                                           | Xylitol Derivative     | C15H22O10   | 362.33  | 36.225 | 0.27 | 219891    |
| S51 | 2-isopropyl-5-methylphenol                                                                                                   | Phenol Derivative      | C10H14O     | 150.22  | 20.286 | 0.25 | 6989      |
| S52 | 4'-Hydroxybutyrophenone oxime                                                                                                | Phenolic Oxime         | C10H13NO2   | 179.22  | 32.775 | 0.22 | 135822598 |
| S53 | 3,5-Dihydroxy-6-methyl-2,3-dihydropyran-4-one                                                                                | Phenol Derivative      | C6H8O4      | 144.12  | 14.971 | 0.20 | 119838    |
| S54 | Formic acid, undecyl ester                                                                                                   | Formate Ester          | C12H24O2    | 200.32  | 26.082 | 0.20 | 229382    |
| S55 | Cyclopentanol                                                                                                                | Cycloalkanol           | C5H10O      | 86.13   | 24.533 | 0.19 | 7298      |
| S56 | 2,2-bis(oxidanylidene)-1,5-dihydroimidazo[4,5-c][1,2,6]thiadiazin-4-one                                                      | Imidazothiadiazinone   | C4H4N4O3S   | 188.17  | 32.245 | 0.19 | 12413165  |
| S57 | Spiro[5.5]undeca-1,7-diene                                                                                                   | Diene                  | C11H16      | 148.24  | 33.340 | 0.15 | 590470    |
| S58 | [(Z)-4-Methylsulfonyloxybut-2-enyl] 2-(tert-butoxycarbonylamino)acetate                                                      | Ester                  | C12H21NO7S  | 323.36  | 24.495 | 0.13 | 5365168   |
| S59 | 2H-Quinolizine-1-methanol, octahydro-                                                                                        | Quinolizine Derivative | C10H19NO    | 169.26  | 34.510 | 0.13 | 297272    |
| S60 | Fumaric acid, 3,5-dimethylphenyl cyclohexylmethyl ester                                                                      | Fumarate Ester         | C19H24O4    | 316.4   | 34.485 | 0.09 | 91711292  |

Table S2. Comprehensive list of the phytochemicals identified in the n-hexane extract by gas chromatography-mass spectrometry. The table includes compound name, molecular formula, molecular weight, retention time, peak area, and PubChem Compound Identifier (CID).

| N°  | Compound                                                                                | Classification | Chemical formula | Molecular weight (g/mol) | Retention time (min) | Peak area (%) | PubChem CID                                   |
|-----|-----------------------------------------------------------------------------------------|----------------|------------------|--------------------------|----------------------|---------------|-----------------------------------------------|
| S1  | 9-Octadecenoic acid                                                                     | Fatty Acid     | C18H34O2         | 282.5                    | 45.998               | 29.17         | <a href="#">637517</a>                        |
| S2  | Octadeca-9,12-dienoic acid                                                              | Fatty Acid     | C18H32O2         | 280.4                    | 45.652               | 12.49         | <a href="#">5280450</a>                       |
| S3  | n-Hexadecanoic acid                                                                     | Fatty Acid     | C16H32O2         | 256.42                   | 39.938               | 11.81         | <a href="#">985</a>                           |
| S4  | Methyl(9Z,12Z)-octadeca-9,12-dienoate                                                   | Ester          | C19H36O2         | 296.5                    | 44.412               | 5.36          | <a href="#">5280590</a>                       |
| S5  | Octadecanoic acid                                                                       | Fatty Acid     | C18H36O2         | 284.5                    | 46.660               | 4.17          | <a href="#">5281</a>                          |
| S6  | 3-Isopropyl-6,7-dimethyltricyclo[4.4.0.(2,8)]decane-9,10-diol                           | Terpenoid      | C15H26O2         | 238.37                   | 32.416               | 3.96          | <a href="#">565273</a>                        |
| S7  | Cyclohexanol, 3-ethenyl-3-methyl-2-(1-methylethenyl)-6-(1-methylethyl)-, (1R,2S,3S,6S)- | Alcohol        | C15H26O          | 222.37                   | 32.190               | 3.63          | <a href="#">10131686</a><br><a href="#">1</a> |
| S8  | 4-Prop-1-en-2-ylcyclohexene-1-carbaldehyde                                              | Aldehyde       | C10H14O          | 150.22                   | 15.435               | 3.02          | <a href="#">16441</a>                         |
| S9  | Citronellyl tiglate                                                                     | Ester          | C15H26O2         | 238.37                   | 35.032               | 2.53          | <a href="#">6386037</a>                       |
| S10 | Isospathulenol                                                                          | Alcohol        | C15H24O          | 220.35                   | 35.430               | 2.34          | <a href="#">14038848</a>                      |
| S11 | Spathulenol                                                                             | Alcohol        | C15H24O          | 220.35                   | 34.504               | 2.02          | <a href="#">92231</a>                         |
| S12 | Methyl (9Z,12Z)-octadeca-9,12-dienoate                                                  | Ester          | C19H34O2         | 294.5                    | 44.135               | 1.63          | <a href="#">5284421</a>                       |
| S13 | Methyl hexadecanoate                                                                    | Ester          | C17H34O2         | 270.5                    | 38.723               | 1.27          | <a href="#">8181</a>                          |
| S14 | 3-Methylheptane                                                                         | Hydrocarbon    | C8H18            | 114.23                   | 2.024                | 1.22          | <a href="#">11519</a>                         |
| S15 | 5,5-diethyl-4-methyl-6-spiro[2.3]hexan                                                  | Hydrocarbon    | C11H18O          | 166.26                   | 22.783               | 1.05          | <a href="#">550247</a>                        |
| S16 | 6-Methyl-1,2,3,5,8,8a-hexahydronaphthalene                                              | Hydrocarbon    | C11H16           | 148.24                   | 33.025               | 0.88          | <a href="#">562093</a>                        |
| S17 | 2,6-Dimethoxy-4-(prop-2-en-1-yl)phenol                                                  | Phenol         | C11H14O3         | 194.23                   | 29.040               | 0.79          | <a href="#">226486</a>                        |
| S18 | (3,7,7-Trimethyl-bicyclo[2.2.1]hept-2-yl)-methanol                                      | Alcohol        | C11H20O          | 168.28                   | 34.191               | 0.75          | <a href="#">558050</a>                        |
| S19 | Stigmastan-6,22-dien, 3,5-dedihydro-                                                    | Sterol         | C29H46           | 394.7                    | 45.088               | 0.74          | <a href="#">5364573</a>                       |
| S20 | 1,4-Dimethyl-7-(prop-1-en-2-yl)-1,2,3,4,5,6,7,8-octahydroazulene                        | Terpenoid      | C15H24           | 204.35                   | 31.183               | 0.71          | <a href="#">5317844</a>                       |
| S21 | 2(3H)-Benzofuranone, 6-ethenylhexahydro-3,6-dimethyl-5-(1-methylethenyl)-               | Lactone        | C15H22O2         | 234.33                   | 34.577               | 0.65          | <a href="#">14038380</a>                      |



|     |                                                                                                                    |                 |          |         |        |      |                                               |
|-----|--------------------------------------------------------------------------------------------------------------------|-----------------|----------|---------|--------|------|-----------------------------------------------|
| S22 | 3-Isopropyl-6,7-dimethyltricyclo[4.4.0.(2,8)]decane-9,10-diol                                                      | Terpenoid       | C15H26O2 | 238.37  | 39.430 | 0.62 | <a href="#">565273</a>                        |
| S23 | Cholest-5-en-3-ol (3.β.)-, propanoate                                                                              | Steroid         | C30H50O2 | 442.7   | 43.595 | 0.59 | <a href="#">12451</a>                         |
| S24 | 2(3H)-Benzofuranone, 6-ethenylhexahydro-3,6-dimethyl-5-(1-methylethenyl)-                                          | Lactone         | C15H22O2 | 234.33  | 35.483 | 0.58 | <a href="#">14038380</a>                      |
| S25 | Myristic acid                                                                                                      | Fatty Acid      | C14H28O2 | 228.37  | 33.676 | 0.44 | <a href="#">11005</a>                         |
| S26 | 2-Isopropyl-4a-methyl-8-methylenedecalin-1,5-diol                                                                  | Terpenoid       | C15H26O2 | 238.37  | 37.755 | 0.42 | <a href="#">14137570</a>                      |
| S27 | Cyclohexanol, 3-ethenyl-3-methyl-2-(1-methylethenyl)                                                               | Alcohol         | C15H26O  | 222.37  | 25.630 | 0.36 | <a href="#">10131686</a><br><a href="#">1</a> |
| S28 | 2,2-Dimethylhexane                                                                                                 | Hydrocarbon     | C8H18    | 114.23  | 2.204  | 0.34 | <a href="#">11551</a>                         |
| S29 | Gamma-dodecalactone                                                                                                | Lactone         | C12H22O2 | 198.3   | 31.423 | 0.34 | <a href="#">16821</a>                         |
| S30 | 1H-cycloprop(e)azulen-7-ol, decahydro-1,1,7-trimethyl-4-methylene-(1AR,4AR,7S,7AR,7BR)-                            | Terpenoid       | C15H24O  | 220.35  | 28.699 | 0.32 | <a href="#">92231</a>                         |
| S31 | 1,3,5-Trimethyl-2,6-di(cyclopentyl)benzene                                                                         | Hydrocarbon     | C19H28   | 256.399 | 42.018 | 0.30 | <a href="#">620628</a>                        |
| S32 | 1,1,4,7-tetramethyldecahydro-1H-cyclopropa(e)azulen-4-ol                                                           | Terpenoid       | C15H26O  | 222.37  | 32.623 | 0.27 | <a href="#">11996452</a>                      |
| S33 | 2(3H)-Furanone, 5-hexyldihydro-                                                                                    | Lactone         | C10H18O2 | 170.25  | 23.746 | 0.26 | <a href="#">12813</a>                         |
| S34 | 2-(Tricyclo[3.3.1.13,7]dec-1-yl)propanoic acid                                                                     | Carboxylic Acid | C13H18O2 | 206.28  | 32.311 | 0.26 | <a href="#">609874</a>                        |
| S35 | 2-Naphthalenemethanol, decahydro-.al                                                                               | Alcohol         | C15H26O  | 222.37  | 30.962 | 0.25 | <a href="#">91457</a>                         |
| S36 | Juniper camphor (1,4a-dimethyl-7-propan-2-ylidene-3,4,5,6,8,8a-hexahydro-2H-naphthalen-1-ol)                       | Terpenoid       | C15H26O  | 222.37  | 31.297 | 0.24 | <a href="#">521214</a>                        |
| S37 | Taylorione (4-[(1S,3R)-2,2-dimethyl-3-(5-methylidenecyclopenten-1-yl)cyclopropyl]butan-2-one)                      | Terpenoid       | C15H22O  | 218.33  | 40.235 | 0.24 | <a href="#">12152394</a>                      |
| S38 | Sinulariolide ((8Z)-12-hydroxy-5,9,13-trimethyl-16-methylidene-4,14-dioxatricyclo[11.3.2.03,5]octadec-8-en-15-one) | Macrolide       | C20H30O4 | 334.4   | 39.252 | 0.22 | <a href="#">5358848</a>                       |
| S39 | 1-((1S,3aR,4R,7S,7aS)-4-Hydroxy-7-isopropyl-4-methyloctahydro-1H-inden-1-yl)ethan-1-one                            | Ketone          | C15H26O2 | 238.37  | 33.324 | 0.21 | <a href="#">10466745</a>                      |
| S40 | 1,1,4,7-Tetramethyldecahydro-1H-cyclopropa[e]azulen-7-ol                                                           | Terpenoid       | C15H26O  | 222.37  | 35.633 | 0.21 | <a href="#">11996452</a>                      |

|     |                                                                                                                        |             |            |        |        |      |                          |
|-----|------------------------------------------------------------------------------------------------------------------------|-------------|------------|--------|--------|------|--------------------------|
| S41 | 4-Isobenzofuranol, octahydro-3a,7a-dimethyl-                                                                           | Alcohol     | C10H18O2   | 170.25 | 36.541 | 0.21 | <a href="#">41057</a>    |
| S42 | (1S,3aS,4S,5S,7aR,8R)-5-Isopropyl-1,7a-dimethyloctahydro-1H-1,4-methanoinden-8-ol                                      | Terpenoid   | C15H26O    | 222.37 | 29.866 | 0.20 | <a href="#">12303891</a> |
| S43 | 2-Oxabicyclo[4.2.0]oct-4-en-3-one, rel                                                                                 | Ketone      | C28H22F2O6 | 492.5  | 48.336 | 0.20 | <a href="#">5377136</a>  |
| S44 | Platambin (4a-methyl-8-methylidene-2-propan-2-yl-1,2,3,4,5,6,7,8a-octahydronaphthalene-1,5-diol)                       | Terpenoid   | C15H26O2   | 238.37 | 37.086 | 0.19 | <a href="#">613194</a>   |
| S45 | (1R,7S,E)-7-Isopropyl-4,10-dimethylenecyclodec-5-enol                                                                  | Terpenoid   | C15H24O    | 220.35 | 31.944 | 0.15 | <a href="#">13304974</a> |
| S46 | (E)-Valerenyl isovalerate                                                                                              | Ester       | C20H32O2   | 304.5  | 40.978 | 0.15 | <a href="#">91730081</a> |
| S47 | Dodecanoic acid                                                                                                        | Fatty Acid  | C12H24O2   | 200.32 | 28.066 | 0.14 | <a href="#">3893</a>     |
| S48 | 1-Nonadecene                                                                                                           | Alkene      | C19H38     | 266.5  | 40.815 | 0.11 | <a href="#">29075</a>    |
| S49 | (S)-(-)-(4-Isopropenyl-1-cyclohexenyl)methanol                                                                         | Alcohol     | C10H16O    | 152.23 | 18.261 | 0.11 | <a href="#">369312</a>   |
| S50 | 4-(1-Methylvinyl)cyclohex-1-ene-1-ethyl formate                                                                        | Ester       | C12H18O2   | 194.27 | 21.755 | 0.10 | <a href="#">3023295</a>  |
| S51 | Spathulenol ((1aR,4aR,7S,7aR,7bR)-1,1,7-trimethyl-4-methylidene-1a,2,3,4a,5,6,7a,7b-octahydrocyclopropa[h]azulen-7-ol) | Alcohol     | C15H24O    | 220.35 | 33.549 | 0.10 | <a href="#">92231</a>    |
| S52 | 1-Naphthalenepropanol, .alpha.-ethenyldecahydro-2-hydroxy-alpha,2,5,5,8a-pentamethyl                                   | Terpenoid   | C20H36O2   | 308.5  | 36.901 | 0.10 | <a href="#">163263</a>   |
| S53 | 1,2-Cyclohexanediol, 1-methyl-4-(1-methylethenyl)                                                                      | Alcohol     | C10H18O2   | 170.25 | 20.427 | 0.09 | <a href="#">441246</a>   |
| S54 | 3-Methylhexane                                                                                                         | Hydrocarbon | C7H16      | 100.2  | 2.119  | 0.08 | <a href="#">11507</a>    |
| S55 | (3E)-6-Methyl-3,5-heptadien-2-one                                                                                      | Ketone      | C8H12O     | 124.18 | 22.650 | 0.08 | <a href="#">5370101</a>  |
| S56 | Tricyclo[4.4.0.0(2,7)]dec-8-ene-3-methanol                                                                             | Terpenoid   | C15H24O    | 220.35 | 27.448 | 0.08 | <a href="#">521030</a>   |
| S57 | 1-Nonadecene                                                                                                           | Alkene      | C19H38     | 266.5  | 34.896 | 0.08 | <a href="#">29075</a>    |
| S58 | (Z)-Dodec-5-en-4-olide                                                                                                 | Lactone     | C12H20O2   | 196.29 | 43.401 | 0.08 | <a href="#">67469926</a> |
| S59 | 3-Cyclohexene-1-carboxaldehyde                                                                                         | Aldehyde    | C7H10O     | 110.15 | 2.459  | 0.05 | <a href="#">7508</a>     |
| S60 | 4-Isopropenylcyclohexanone                                                                                             | Ketone      | C9H14O     | 138.21 | 10.440 | 0.05 | <a href="#">549291</a>   |
| S61 | Heptane                                                                                                                | Hydrocarbon | C7H16      | 100.2  | 2.329  | 0.04 | <a href="#">8900</a>     |

Table S3. Comparison of the key phytochemicals (with their peak area) present in the methanol and n-hexane extracts, identified by gas chromatography/mass spectrometry.

| N° | Methanol extraction                                                                                                   |                  | n-Hexane extraction                                                                            |                  |
|----|-----------------------------------------------------------------------------------------------------------------------|------------------|------------------------------------------------------------------------------------------------|------------------|
|    | Compounds<br>(IUPAC Name)                                                                                             | Peak area<br>(%) | Compounds<br>(IUPAC Name)                                                                      | Peak area<br>(%) |
| 1  | 9-Octadecenoic acid                                                                                                   | 29.69            | 9-Octadecenoic acid                                                                            | 29.17            |
| 2  | Methyl(9Z,12Z)-octadeca-9,12-dienoate                                                                                 | 8.87             | Octadeca-9,12-dienoic acid                                                                     | 12.49            |
| 3  | Octadeca-9,12-dienoic acid                                                                                            | 8.77             | n-Hexadecanoic acid                                                                            | 11.81            |
| 4  | Methyl hexadecanoate                                                                                                  | 4.87             | Methyl(9Z,12Z)-octadeca-9,12-dienoate                                                          | 5.36             |
| 5  | n-Hexadecanoic acid                                                                                                   | 3.86             | Octadecanoic acid                                                                              | 4.17             |
| 6  | Methyl (9Z,12Z)-octadeca-9,12-dienoate                                                                                | 2.89             | 3-Isopropyl-6,7-dimethyltricyclo<br>[4.4.0.0(2,8)]decane-9,10-diol                             | 3.96             |
| 7  | Trichothec-9-ene-3,4,8,15-tetrol, 12,13-<br>epoxy-, 15-acetate 8-(3-methylbutanoate),<br>(3.alpha.,4.beta.,8.alpha.)- | 2.89             | Cyclohexanol, 3-ethenyl-3-methyl-2-(1-<br>methylethenyl)-6-(1-methylethyl)-,<br>(1R,2S,3S,6S)- | 3.63             |
| 8  | Octadecanoic acid                                                                                                     | 2.76             | 4-Prop-1-en-2-ylcyclohexene-1-<br>carbaldehyde                                                 | 3.02             |
| 9  | Neophytadiene                                                                                                         | 1.82             | Citronellyl tiglate                                                                            | 2.53             |
| 10 | Methyl-5,9,13-trimethyltetradecanoate                                                                                 | 1.75             | Isospathulenol                                                                                 | 2.34             |
| 11 | Disparlure                                                                                                            | 1.61             | Spathulenol                                                                                    | 2.02             |
| 12 | 3-Isopropyl-6,7-dimethyltricyclo<br>[4.4.0.0(2,8)]decane-9,10-diol                                                    | 1.57             | Methyl (9Z,12Z)-octadeca-9,12-dienoate                                                         | 1.63             |
| 13 | 2-hydroxyacetohydrazide                                                                                               | 1.53             | Methyl hexadecanoate                                                                           | 1.27             |
| 14 | Phthalic acid, butyl hept-4-yl ester                                                                                  | 1.45             | 3-Methylheptane                                                                                | 1.22             |
| 15 | 2-Pentanone, 4,4-dimethyl-                                                                                            | 1.36             | 5,5-diethyl-4-methyl-6-spiro[2.3]hexan                                                         | 1.05             |
|    | Sum                                                                                                                   | 76.10            | Sum                                                                                            | 85.67            |

Table S4: Impact of different concentrations of the methanol and n-hexane extracts from *Ammodaucus leucotrichus* seeds on BSA denaturation. Comparison with diclofenac (reference anti-inflammatory drug) in a BSA denaturation assay and IC<sub>50</sub> values (µg/ml) for BSA denaturation inhibition. Data are the mean ± standard error of the mean.

| Active ingredients | Concentration<br>(µg/mL) | Log concentration<br>(µg/mL) | Inhibition (%) | IC <sub>50</sub> (µg/mL) |
|--------------------|--------------------------|------------------------------|----------------|--------------------------|
| Methanol extract   | 3.00                     | 0.59                         | 5.67 ±0.50     | 5408.00                  |
|                    | 7.81                     | 0.89                         | 13.67 ±0.50    |                          |
|                    | 15.62                    | 1.19                         | 14.67 ±0.50    |                          |
|                    | 31.20                    | 1.49                         | 17.67 ±0.50    |                          |
|                    | 62.50                    | 1.79                         | 22.00 ±0.00    |                          |
|                    | 125.00                   | 2.09                         | 24.67 ±0.50    |                          |
|                    | 250.00                   | 2.39                         | 26.00 ±0.00    |                          |
| n-hexane extract   | 3.00                     | 0.59                         | 8.30 ±0.45     | 14.30                    |
|                    | 7.81                     | 0.89                         | 20.93 ±0.32    |                          |

|            |        |      |             |       |
|------------|--------|------|-------------|-------|
|            | 15.62  | 1.19 | 56.14 ±0.05 |       |
|            | 31.20  | 1.49 | 84.05 ±0.45 |       |
|            | 62.50  | 1.79 | 90.36 ±0.57 |       |
|            | 125.00 | 2.09 | 91.33 ±0.57 |       |
|            | 250.00 | 2.39 | 94.00 ±0.00 |       |
| Diclofenac | 3.00   | 0.59 | 10.67 ±0.15 | 42.30 |
|            | 7.81   | 0.89 | 24.67 ±0.50 |       |
|            | 15.62  | 1.19 | 30.00 ±0.00 |       |
|            | 31.20  | 1.49 | 34.10 ±0.49 |       |
|            | 62.50  | 1.79 | 51.36 ±0.90 |       |
|            | 125.00 | 2.09 | 76.85 ±0.57 |       |
|            | 250.00 | 2.39 | 99.22 ±0.41 |       |

**Table S5:** Trypsin inhibition by the methanol and n-hexane extracts from *Ammodaucus leucotrichus* seeds compared with Diclofenac (reference drug) at different concentrations, and IC<sub>50</sub> values (µg/ml) for trypsin inhibition. Data are the mean ± standard error of the mean.

| Active ingredients | Concentration (µg/mL) | Log concentration (µg/mL) | Inhibition (%) | IC <sub>50</sub> (µg/mL) |
|--------------------|-----------------------|---------------------------|----------------|--------------------------|
| Methanol extract   | 31.20                 | 1.49                      | 3.00 ±0.00     | 82.97                    |
|                    | 62.50                 | 1.79                      | 23.00±0.00     |                          |
|                    | 125.00                | 2.09                      | 85.00±0.57     |                          |
|                    | 250.00                | 2.39                      | 100.00±0.01    |                          |
|                    | 500.00                | 2.69                      | 100.00 ±0.01   |                          |
| n-Hexane extract   | 31.20                 | 1.49                      | 6.00±0.00      | 202.70                   |
|                    | 62.50                 | 1.79                      | 10.33±0.57     |                          |
|                    | 125.00                | 2.09                      | 30.00±0.00     |                          |
|                    | 250.00                | 2.39                      | 51.00±0.48     |                          |
|                    | 500.00                | 2.69                      | 100.00±0.00    |                          |
| Diclofenac         | 31.20                 | 1.49                      | 6.00±0.00      | 97.04                    |
|                    | 62.50                 | 1.79                      | 23.00±0.00     |                          |
|                    | 125.00                | 2.09                      | 64.67±0.57     |                          |
|                    | 250.00                | 2.39                      | 100.00±0.00    |                          |
|                    | 500.00                | 2.69                      | 100.00±0.00    |                          |

**Table S6:** Binding energies (in kJ/mol) of the 59 key compounds identified in the methanol extract from *Ammodaucus leucotrichus* seeds and of diclofenac during their interactions with trypsin. The different binding energy values reflect variations in the inhibitory potential of the compounds against trypsin.

| N° | Compound                | Classification | PubChem CID | Binding energy (KJ/mol) |
|----|-------------------------|----------------|-------------|-------------------------|
| S1 | 2-hydroxyacetohydrazide | Hydrazide      | 350536      | -17.13                  |

|     |                                                                                                                             |                       |           |        |
|-----|-----------------------------------------------------------------------------------------------------------------------------|-----------------------|-----------|--------|
| S2  | 3-Hydroxy-3-methyl-butyric acid, hydrazide                                                                                  | Hydrazide             | 299142    | -14.44 |
| S3  | 2,2-bis(oxidanylidene)-1,5-dihydroimidazo[4,5-c][1,2,6]thiadiazin-4-one                                                     | Imidazo Thiadiazinone | 12413165  | -14.39 |
| S4  | 4'-Hydroxybutyrophenone oxime                                                                                               | Oxime                 | 135822598 | -13.45 |
| S5  | Diclofenac (2-[(2,6-dichlorophenyl)amino]benzeneacetic acid)                                                                |                       | 3033      | -13.01 |
| S6  | 3,5-Dihydroxy-6-methyl-2,3-dihdropyran-4-one                                                                                | Pyranone              | 119838    | -12.41 |
| S7  | 6-(3-Hydroxyprop-1-en-2-yl)-4,8 $\alpha$ -dimethyl-2,4 $\alpha$ ,5,6,7,8-hexahydro-1H-naphthalen-2-ol                       | Alcohol               | 535256    | -11.44 |
| S8  | 5-Hydroxymethylfurfural                                                                                                     | Furfural              | 237332    | -11.21 |
| S9  | 5-nitrobenzofuran-2(3H)-one                                                                                                 | Benzofuranone         | 230976    | -9.89  |
| S10 | 1-Propanol, 2-amino-, (+/-)-                                                                                                | Amino Alcohol         | 5126      | -8.28  |
| S11 | (7S)-1,1,7-Trimethyl-4-methylidene-1 $\alpha$ ,2,3,4 $\alpha$ ,5,6,7 $\alpha$ ,7 $\beta$ -octahydrocyclopropa[h]azulen-7-ol | Sesquiterpene Alcohol | 6432640   | -8.01  |
| S12 | Spiro[5.6]dodecan-7-one                                                                                                     | Ketone                | 282264    | -7.27  |
| S13 | (1R,4R,6R,10S)-4,12,12-Trimethyl-9-methylene-5-oxatricyclo[8.2.0.0.4,6]dodecane                                             | Triterpene            | 1742210   | -5.99  |
| S14 | Cyclopentanol                                                                                                               | Alcohol               | 7298      | -5.83  |
| S15 | Thymol (2-isopropyl-5-methylphenol.)                                                                                        | Phenol                | 6989      | -5.51  |
| S16 | Isospathulenol ((1R,4R,6R)-1,4,7,7-tetramethylbicyclo[4.1.0]heptan-2-ol)                                                    | Sesquiterpene Alcohol | 102303030 | -5.17  |
| S17 | Fumaric acid (3,5-dimethylphenyl cyclohexylmethyl ester)                                                                    | Fumarate Ester        | 91711292  | -4.87  |
| S18 | 4-Prop-1-en-2-ylcyclohexene-1-carboxylic acid                                                                               | Carboxylic Acid       | 1256      | -4.82  |
| S19 | 2H-Quinolizine-1-methanol, octahydro-                                                                                       | Quinolizine Alcohol   | 297272    | -4.67  |
| S20 | 8-Isopropyl-1,5-dimethyltricyclo[4.4.0.0.2,7]dec-4-en-3-one                                                                 | Ketone                | 12313013  | -4.74  |
| S21 | Formic acid undecyl ester (Undecyl methanoate)                                                                              | Carboxylic Acid Ester | 229382    | -4.19  |
| S22 | [(Z)-4-Methylsulfonyloxybut-2-enyl] 2-(tert-butoxycarbonylamino)acetate                                                     | Ester                 | 5365168   | -4.17  |
| S23 | Phthalic acid, butyl hept-4-yl ester                                                                                        | Phthalate Ester       | 91720764  | -3.19  |
| S24 | trans-(R,R)-chrysanthemyl (R)-2-methylbutanoate                                                                             | Terpenoid Ester       | 91693481  | -2.10  |
| S25 | 4,4-dimethylpentan-2-one                                                                                                    | Ketone                | 11546     | -2.00  |
| S26 | 2-Ethylidene-1,7,7-trimethylbicyclo[2.2.1]heptane                                                                           | Bicyclic Hydrocarbon  | 143908    | -1.51  |
| S27 | Thunbergol (4-Isopropyl-1,7,11-trimethyl-2,7,11-cyclotetradecatrien-1-ol)                                                   | Terpenoid             | 5363523   | -1.39  |

|     |                                                                                                                                                 |                                    |                |       |
|-----|-------------------------------------------------------------------------------------------------------------------------------------------------|------------------------------------|----------------|-------|
| S28 | Methyl 16-R/S-hydroxy-cleroda-3,13(14)-Z-dien-15,16-olide                                                                                       | Diterpenoid Lactone                | 16042541       | -0.56 |
| S29 | 3beta-Trimethylsiloxy-5alpha,6alpha-epoxycholestane                                                                                             | Steroid                            | 16082384       | 0     |
| S30 | Trichloro(dodecyl)silane                                                                                                                        | Organosilane                       | 20568          | 0     |
| S31 | 3-Isopropyl-6,7-dimethyltricyclo[4.4.0.0(2,8)]decane-9,10-diol                                                                                  | Sesquiterpene Alcohol              | 565273         | 0     |
| S32 | Spiro[5.5]undeca-1,7-diene (1,1,7,7-tetracyclo[6.4.0.0 <sup>2</sup> , <sup>6</sup> .0 <sup>7</sup> , <sup>11</sup> ]dodeca-2,4,6,8,10-pentaene) | Hydrocarbon                        | 590470         | 0     |
| S33 | n-tetradecanoic acid                                                                                                                            | Fatty Acid                         | 11005          | 0     |
| S34 | 1-(1,5-Dimethylhexyl)-10-hydroxy-3a,6,6,9a,11a-pentamethylhexadecahydrocyclopenta[7,8]-phenanthro[8a,9-b]oxiren-7-yl acetate                    | Sesquiterpene Ester                | 541562         | 0     |
| S35 | Longifolenaldehyde (2R,5S)-5-[(1R)-1,5-dimethylhex-4-en-1-yl]-2-methylcyclohex-2-en-1-one)                                                      | Aldehyde                           | 565584         | 0     |
| S36 | Neophytadiene ((6Z,9Z,12Z,15Z)-neophytadiene)                                                                                                   | Sesquiterpene                      | 10446          | 0     |
| S37 | 2,4,7,14-Tetramethyl-4-vinyl-tricyclo[5.4.3.0(1,8)]tetradecan-6-ol                                                                              | Terpenoid Alcohol                  | 590916         | 0     |
| S38 | Benzo - octahydro - acephenanthrylene                                                                                                           | Hydrocarbon                        | 155017         | 0     |
| S39 | Phthalic acid, tetradecyl trans-dec-3-enyl ester                                                                                                | Phthalate Ester                    | 91719824       | 0     |
| S40 | Octadecamethyl-cyclononasiloxane                                                                                                                | Siloxane                           | 11172          | 0     |
| S41 | 1,2,3,4,5-Penta-O-acetyl-D-xylitol                                                                                                              | Xylitol Ester                      | 219891         | 0     |
| S42 | 4-Prop-1-en-2-ylcyclohexene-1-carbaldehyde                                                                                                      | Aldehyde                           | 16441          | 0     |
| S43 | 3,7,11,15-Tetramethyl-2-hexadecen-1-ol                                                                                                          | Terpenoid Alcohol                  | 5366244        | 0     |
| S44 | Longifolenaldehyde ((2R,5S)-5-[(1R)-1,5-dimethylhex-4-en-1-yl]-2-methylcyclohex-2-en-1-one)                                                     | Aldehyde                           | 103883460      | 0     |
| S45 | Cyclopropanebutanoic acid, Methyl-4-[2-[[2-[(2-pentylcyclopropyl)methyl]cyclopropyl)methyl]cyclopropyl)methyl]-cyclopropyl]butanoate            | Cyclopropane Carboxylic Acid Ester | 554084         | 0     |
| S46 | Methyl hexadecanoate                                                                                                                            | Fatty Acid Ester                   | 8181           | 0     |
| S47 | n-Hexadecanoic acid                                                                                                                             | Fatty Acid                         | 985            | 0     |
| S48 | Disparlure (cis-7,8-epoxy-2-methyloctadecane)                                                                                                   | Pheromone                          | 205983         | 0     |
| S49 | Heptadecanoic acid                                                                                                                              | Fatty Acid                         | 10465          | 0     |
| S50 | Methyl (9Z,12Z)-octadeca-9,12-dienoate                                                                                                          | Fatty Acid Ester                   | 5284421        | 0     |
| S51 | Methyl(9Z,12Z)-octadeca-9,12-dienoate                                                                                                           | Fatty Acid Ester                   | 5280590        | 0     |
| S52 | Kauren-19-yl-acetate                                                                                                                            | Diterpene Ester                    | 5284421        | 0     |
| S53 | 2-(trans-2,6,6-Trimethylbicyclo[3.3.1]heptan-3-yl)buta-1,3-diene                                                                                | Terpenoid Diene                    | <u>5280590</u> | 0     |
| S54 | Methyl-5,9,13-trimethyltetradecanoate                                                                                                           | Fatty Acid Ester                   | 554056         | 0     |
| S55 | Octadeca-9,12-dienoic acid                                                                                                                      | Fatty Acid                         | 5280450        | 0     |

|     |                                                                                                                |                            |        |   |
|-----|----------------------------------------------------------------------------------------------------------------|----------------------------|--------|---|
| S56 | 9-Octadecenoic acid                                                                                            | Fatty Acid                 | 637517 | 0 |
| S57 | Octadecanoic acid                                                                                              | Fatty Acid                 | 5281   | 0 |
| S58 | Tetracontane                                                                                                   | Hydrocarbon                | 20149  | 0 |
| S59 | Trichothec-9-ene-3,4,8,15-tetrol, 12,13-epoxy-, 15-acetate 8-(3-methylbutanoate), (3.alpha.,4.beta.,8.alpha.)- | Trichothecene<br>Mycotoxin | 520286 | 0 |

Table S7. PASS prediction of the bioactivities of the 59 phytochemicals identified in the methanol extract from *Ammodaucus leucotrichus* seeds.

| N°  | Compound                                                       | Anti-inflammatory effects |       | RA therapeutic target        |
|-----|----------------------------------------------------------------|---------------------------|-------|------------------------------|
|     |                                                                | Pa                        | Pi    |                              |
| S1  | Tetradecanoic acid                                             | 0.935                     | 0.003 | Sphinganine kinase inhibitor |
| S2  | Octadecanoic acid                                              | 0.935                     | 0.003 |                              |
| S3  | Heptadecanoic acid                                             | 0.935                     | 0.003 |                              |
| S4  | n-Hexadecanoic acid                                            | 0.935                     | 0.003 |                              |
| S5  | Tetracontane                                                   | 0.915                     | 0.004 |                              |
| S6  | Methyl(9Z,12Z)-octadeca-9,12-dienoate                          | 0.905                     | 0.004 |                              |
| S7  | 9-Octadecenoic acid                                            | 0.905                     | 0.002 |                              |
| S8  | Octadeca-9,12-dienoic acid                                     | 0.873                     | 0.005 |                              |
| S9  | 2-Pentanone, 4,4-dimethyl-                                     | 0.867                     | 0.004 |                              |
| S10 | Phthalic acid, tetradecyl trans-dec-3-enyl ester               | 0.866                     | 0.007 |                              |
| S11 | Methyl hexadecanoate                                           | 0.845                     | 0.009 |                              |
| S12 | Formic acid, undecyl ester                                     | 0.819                     | 0.012 |                              |
| S13 | Trichloro(dodecyl)silane                                       | 0.814                     | 0.012 |                              |
| S14 | 1,2,3,4,5-Penta-O-acetyl-D-xylitol                             | 0.819                     | 0.012 |                              |
| S15 | Disparlure                                                     | 0.818                     | 0.012 |                              |
| S16 | Phthalic acid, butyl hept-4-yl ester                           | 0.754                     | 0.018 |                              |
| S17 | Methyl (9Z,12Z)-octadeca-9,12-dienoate                         | 0.648                     | 0.029 |                              |
| S18 | Cyclopentanol                                                  | 0.860                     | 0.004 | JAK2 expression inhibitor    |
| S19 | Thymol                                                         | 0.737                     | 0.014 |                              |
| S20 | 3,5-Dihydroxy-6-methyl-2,3-dihydropyran-4-one                  | 0.730                     | 0.014 |                              |
| S21 | 2-Ethylidene-1,7,7-trimethylbicyclo[2.2.1]heptane              | 0.724                     | 0.015 |                              |
| S22 | Octahydro-2-benzothiophene                                     | 0.715                     | 0.016 |                              |
| S23 | Spiro[5.5]undeca-1,7-diene                                     | 0.707                     | 0.017 |                              |
| S24 | Spiro[5.6]dodecan-7-one                                        | 0.684                     | 0.019 |                              |
| S25 | 3-Isopropyl-6,7-dimethyltricyclo[4.4.0.0(2,8)]decane-9,10-diol | 0.571                     | 0.037 |                              |

|     |                                                                                                                                      |       |       |                                                              |
|-----|--------------------------------------------------------------------------------------------------------------------------------------|-------|-------|--------------------------------------------------------------|
| S26 | 2-(trans-2,6,6-Trimethylbicyclo[3.3.1]heptan-3-yl)buta-1,3-diene                                                                     | 0.868 | 0.002 | Transcription factor NF kappa B stimulant                    |
| S27 | 8-Isopropyl-1,5-dimethyltricyclo[4.4.0.02,7]dec-4-en-3-one                                                                           | 0.735 | 0.004 |                                                              |
| S28 | 4-Prop-1-en-2-ylcyclohexene-1-carboxylic acid                                                                                        | 0.733 | 0.004 |                                                              |
| S29 | thunbergol ((2E,7E,11E)-1,7,11-trimethyl-4-propan-2-ylcyclohexadeca-2,7,11-trien-1-ol)                                               | 0.730 | 0.004 |                                                              |
| S30 | Neophytadiene (7,11,15-trimethyl-3-methylidenehexadec-1-ene)                                                                         | 0.620 | 0.008 |                                                              |
| S31 | 2,4,7,14-Tetramethyl-4-vinyl-tricyclo[5.4.3.0(1,8)]tetradecan-6-ol                                                                   | 0.563 | 0.013 |                                                              |
| S32 | Cyclopropanebutanoic acid, Methyl-4-[2-[[2-[(2-pentylcyclopropyl)methyl]cyclopropyl)methyl]cyclopropyl)methyl]-cyclopropyl]butanoate | 0.388 | 0.057 | G-protein-coupled receptor kinase inhibitor                  |
| S33 | 1-amino-propan-2-ol racemate.                                                                                                        | 0.926 | 0.003 |                                                              |
| S34 | 5-Hydroxymethylfurfural                                                                                                              | 0.749 | 0.018 |                                                              |
| S35 | 3,7,11,15-Tetramethyl-2-hexadecen-1-ol                                                                                               | 0.694 | 0.023 |                                                              |
| S36 | 2H-Quinolizine-1-methanol, octahydro-                                                                                                | 0.680 | 0.025 |                                                              |
| S37 | 3-Hydroxy-3-methyl-butyric acid, hydrazide                                                                                           | 0.656 | 0.027 | MMP9 expression inhibitor                                    |
| S38 | Isospathulenol ((1R,4R,6R)-1,4,7,7-tetramethylbicyclo[4.1.0]heptan-2-ol)                                                             | 0.729 | 0.005 |                                                              |
| S39 | 2,2-bis(oxidanylidene)-1,5-dihydroimidazo[4,5-c][1,2,6]thiadiazin-4-one                                                              | 0.675 | 0.032 | <u>Methylenetetrahydrofolate reductase (NADPH) inhibitor</u> |
| S40 | 5-nitrobenzofuran-2(3H)-one                                                                                                          | 0.878 | 0.004 | Glutathione S-transferase                                    |
| S41 | [(Z)-4-Methylsulfonyloxybut-2-enyl] 2-(tert-butoxycarbonylamino)acetate                                                              | 0.840 | 0.006 |                                                              |
| S42 | Methyl-5,9,13-trimethyltetradecanoate                                                                                                | 0.641 | 0.032 |                                                              |
| S43 | Octadecamethyl-cyclononasiloxane                                                                                                     | 0.852 | 0.004 | Complement factor D inhibitor                                |
| S44 | 4'-Hydroxybutyrophenone oxime                                                                                                        | 0.619 | 0.034 |                                                              |
| S45 | Trichothec-9-ene-3,4,8,15-tetrol, 12,13-epoxy-, 15-acetate 8-(3-methylbutanoate), (3.alpha.,4.beta.,8.alpha.)-                       | 0.858 | 0.002 | Immunosuppressant                                            |
| S46 | 1-(1,5-Dimethylhexyl)-10-hydroxy-3a,6,6,9a,11a-pentamethylhexadecahydrocyclopenta[7,8]-phenanthro[8a,9-b]oxiren-7-yl acetate         | 0.795 | 0.005 |                                                              |
| S47 | 6-(3-Hydroxyprop-1-en-2-yl)-4,8a-dimethyl-2,4a,5,6,7,8-hexahydro-1H-naphthalen-2-ol                                                  | 0.759 | 0.010 |                                                              |
| S48 | (1R,4R,6R,10S)-4,12,12-Trimethyl-9-methylene-5-oxatricyclo[8.2.0.04,6]dodecane                                                       | 0.758 | 0.010 |                                                              |
| S49 | 3beta-Trimethylsiloxy-5alpha,6alpha-epoxycholestane                                                                                  | 0.727 | 0.014 |                                                              |
| S50 | 4-Prop-1-en-2-ylcyclohexene-1-carbaldehyde                                                                                           | 0.722 | 0.014 |                                                              |
| S51 | (7S)-1,1,7-Trimethyl-4-methylidene-1alpha,2,3,4alpha,5,6,7alpha,7beta-octahydrocyclopropa[h]azulen-7-ol                              | 0.713 | 0.015 |                                                              |



|     |                                                                                             |       |       |               |
|-----|---------------------------------------------------------------------------------------------|-------|-------|---------------|
| S52 | Longifolenaldehyde ((2R,5S)-5-[(1R)-1,5-dimethylhex-4-en-1-yl]-2-methylcyclohex-2-en-1-one) | 0.713 | 0.015 |               |
| S53 | Methyl 16-R/S-hydroxy-cleroda-3,13(14)-Z-dien-15,16-olide                                   | 0.675 | 0.020 |               |
| S54 | Isospathulenol ((1R,4R,6R)-1,4,7,7-tetramethylbicyclo[4.1.0]heptan-2-ol)                    | 0.658 | 0.022 |               |
| S55 | Thunbergol (4-Isopropyl-1,7,11-trimethyl-2,7,11-cyclotetradecatrien-1-ol)                   | 0.613 | 0.027 |               |
| S56 | Kauren-19-yl-acetate                                                                        | 0.613 | 0.027 |               |
| S57 | trans-(R,R)-chrysanthemyl (R)-2-methylbutanoate                                             | 0.473 | 0.048 |               |
| S58 | Fumaric acid, 3,5-dimethylphenyl cyclohexylmethyl ester                                     | 0.402 | 0.065 |               |
| S59 | 2-hydroxyacetohydrazide                                                                     |       |       | Carbons 1 < 3 |
